# Supplementary material
Source: PubMed Central journal article supplement (PMC3139238)
Supplement: supp_jn.110.125336_nut125336ST1.pdf [file supp_jn.110.125336_nut125336ST1.pdf]

Online Supporting Material

Supplemental Table 1: Nutritional value and ingredients in smoothies<sup>1</sup>

| Nutritional Value                                     | Blueberry | Placebo |
|-------------------------------------------------------|-----------|---------|
| Energy, kJ <sup>2</sup>                               | 1001      | 980     |
| Carbohydrate, g                                       | 48.5      | 48.6    |
| Fiber, g                                              | 4.2       | 4.3     |
| Protein, g                                            | 11.9      | 11.1    |
| Fat, g                                                | 0.08      | 0.08    |
| Saturated fat, g                                      | 0.05      | 0.05    |
| Ingredients                                           |           |         |
| Dannon Light & Fit yogurt, g                          | 245.0     | 245.0   |
| Skim milk, g                                          | 105.0     | 105.0   |
| Freeze-dried blueberry powder, g                      | 22.5      | —       |
| Imitation vanilla flavor, g                           | 5.0       | —       |
| Splenda, g                                            | 1.0       | —       |
| Benefiber, g                                          | —         | 5.0     |
| Sugar, g                                              | —         | 12.0    |
| Artificial blueberry flavor<br>(liquid and powder), g | —         | 4.0     |
| Red food color, g                                     | —         | 1.5     |
| Blue food color, g                                    | —         | 0.7     |

<sup>1</sup>Information based on one smoothie and participants consumed two smoothies per day.

<sup>2</sup>Blueberry, 239 kcal and Placebo, 234 kcal.
